# Supplementary material for: Blue emitting iridium complexes: synthesis, photophysics and phosphorescent devices
Source: Royal Society of Chemistry journal article supplement (doi:10.1039/b512081k), 2006-01-01
Supplement: b512081k.pdf [file b512081k.pdf]

## Supporting Information for

# Blue emitting iridium complexes: synthesis, photophysics and phosphorescent devices

Roberta Ragni,<sup>a</sup> Edward A. Plummer,<sup>b,c</sup> Klemens Brunner,<sup>c</sup> Johannes W. Hofstraat,<sup>c</sup> Francesco Babudri,<sup>a,d</sup> Gianluca M. Farinola,<sup>a</sup> Francesco Naso\*<sup>a,d</sup> and Luisa De Cola\*<sup>b</sup>

<sup>a</sup> Dipartimento di Chimica, Università degli Studi di Bari, via Orabona 4, I-70126 Bari, Italy.

<sup>b</sup> HIMS-Molecular Photonic Materials, University of Amsterdam, Nieuwe Achtergracht 166, 1018 WV Amsterdam, The Netherlands and Westfälische Wilhelms-Universität, Physikalisches Institut, Mendelstr. 7, D-48149 Muenster, Germany.

<sup>c</sup> Philips Research, Philips Natuurkundig Laboratorium, Prof. Holstlaan 4, 5656 AA Eindhoven, The Netherlands.

<sup>d</sup> CNR-ICCOM, Sezione di Bari, Dipartimento di Chimica, Università degli Studi di Bari, via Orabona 4, I-70126 Bari, Italy.

### Contents

<sup>1</sup>H NMR and <sup>13</sup>C NMR spectra of F<sub>3</sub>ppyH (Figures 1 and 2)

<sup>1</sup>H NMR and <sup>13</sup>C NMR spectra of F<sub>4</sub>ppyH (Figures 3 and 4)

<sup>1</sup>H NMR and <sup>13</sup>C NMR spectra of *mer*-Ir(F<sub>3</sub>ppy)<sub>3</sub> (Figures 5 and 6)

<sup>1</sup>H NMR and <sup>13</sup>C NMR spectra of *mer*-Ir(F<sub>4</sub>ppy)<sub>3</sub> (Figures 7 and 8)

<sup>1</sup>H NMR spectrum of *fac*-Ir(F<sub>4</sub>ppy)<sub>3</sub> (Figure 9)

<sup>1</sup>H NMR spectrum of (F<sub>3</sub>ppy)<sub>2</sub>Ir(μ-Cl)<sub>2</sub>Ir(F<sub>3</sub>ppy)<sub>2</sub> (Figure 10)

<sup>1</sup>H NMR spectrum of (F<sub>4</sub>ppy)<sub>2</sub>Ir(μ-Cl)<sub>2</sub>Ir(F<sub>4</sub>ppy)<sub>2</sub> (Figure 11)

<sup>1</sup>H NMR and <sup>13</sup>C NMR spectra of (F<sub>3</sub>ppy)<sub>2</sub>Ir(acac) (Figures 12 and 13)

<sup>1</sup>H NMR and <sup>13</sup>C NMR spectra of (F<sub>4</sub>ppy)<sub>2</sub>Ir(acac) (Figures 14 and 15)

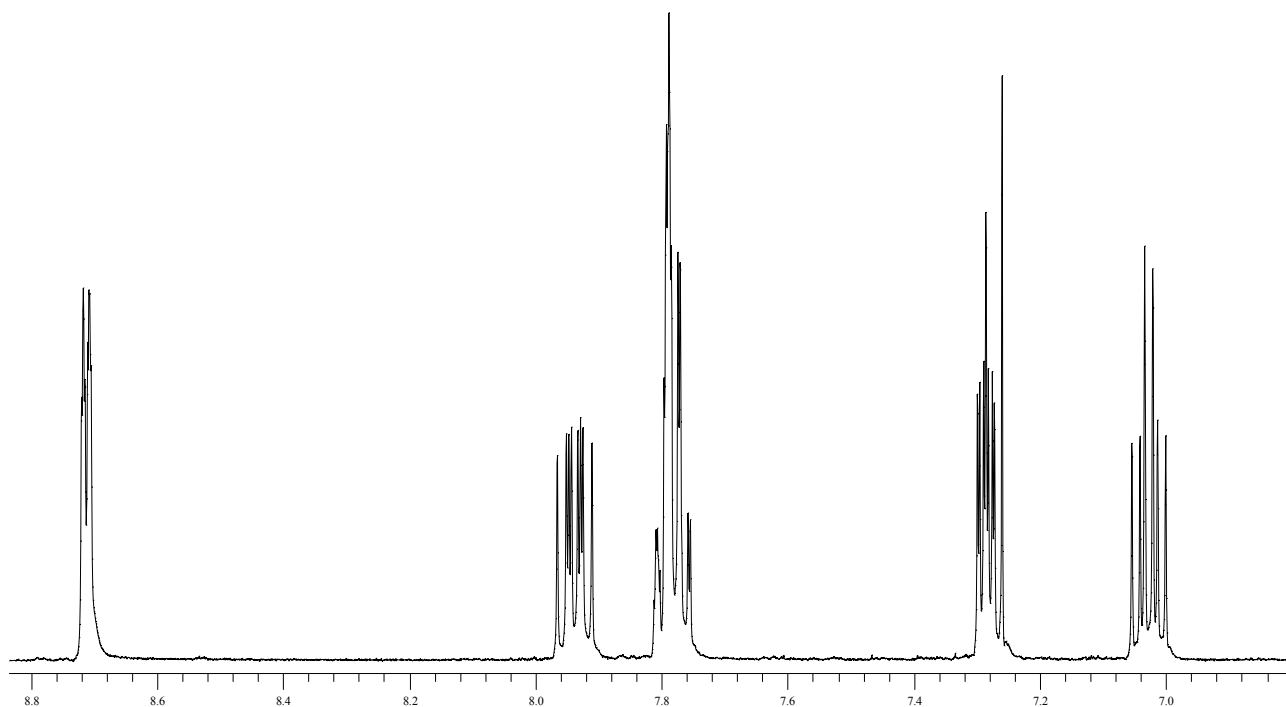

**Figure 1.**  $^1\text{H}$  NMR spectrum of  $\text{F}_3\text{ppyH}$  in  $\text{CDCl}_3$

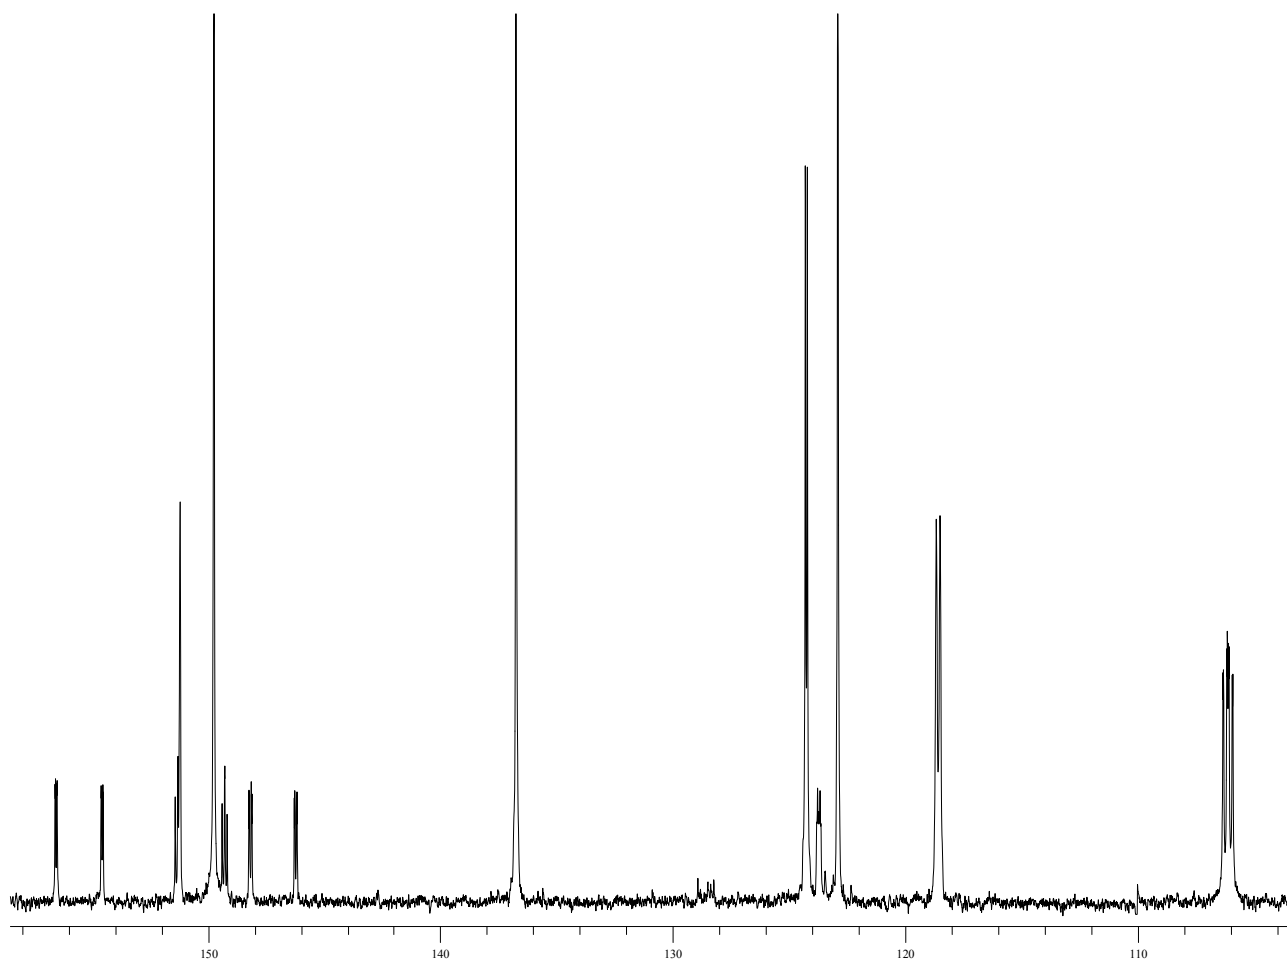

**Figure 2.**  $^{13}\text{C}$  NMR spectrum of  $\text{F}_3\text{ppyH}$  in  $\text{CDCl}_3$

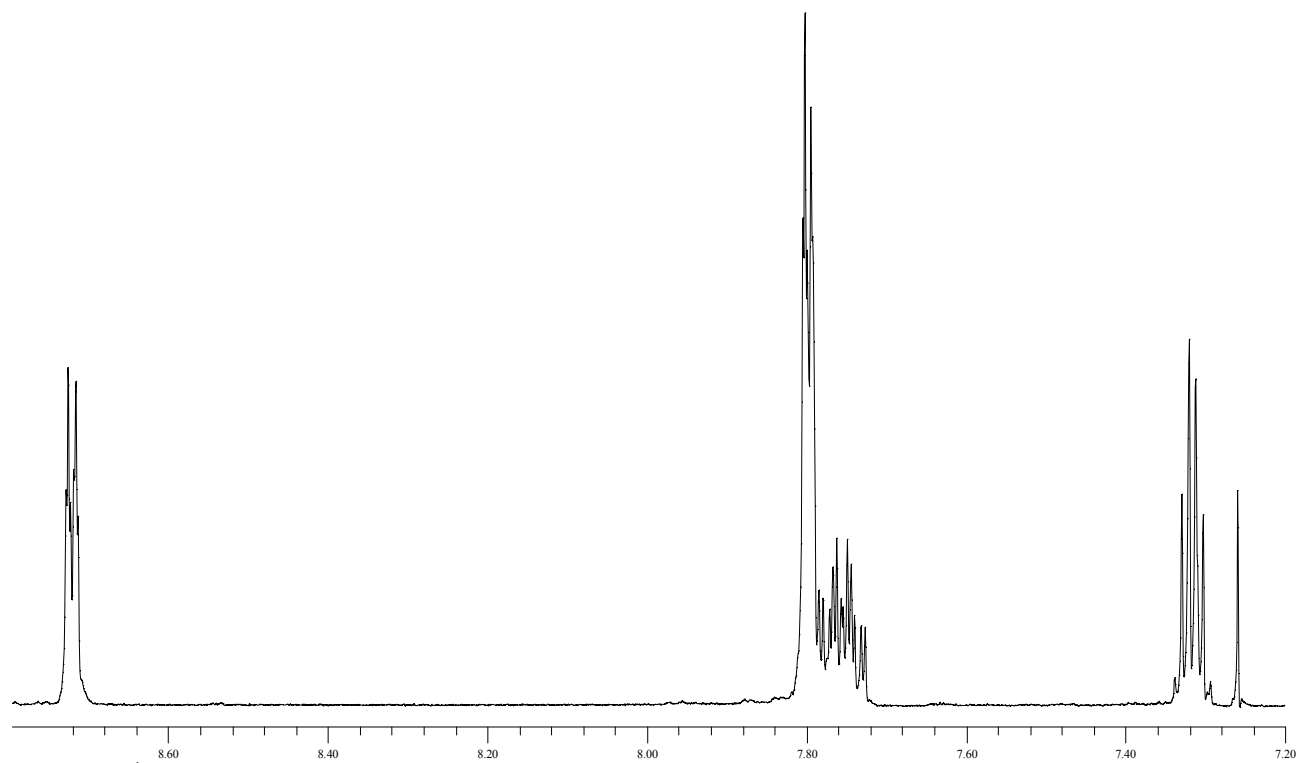

**Figure 3.** <sup>1</sup>H NMR spectrum of F<sub>4</sub>ppyH in CDCl<sub>3</sub>

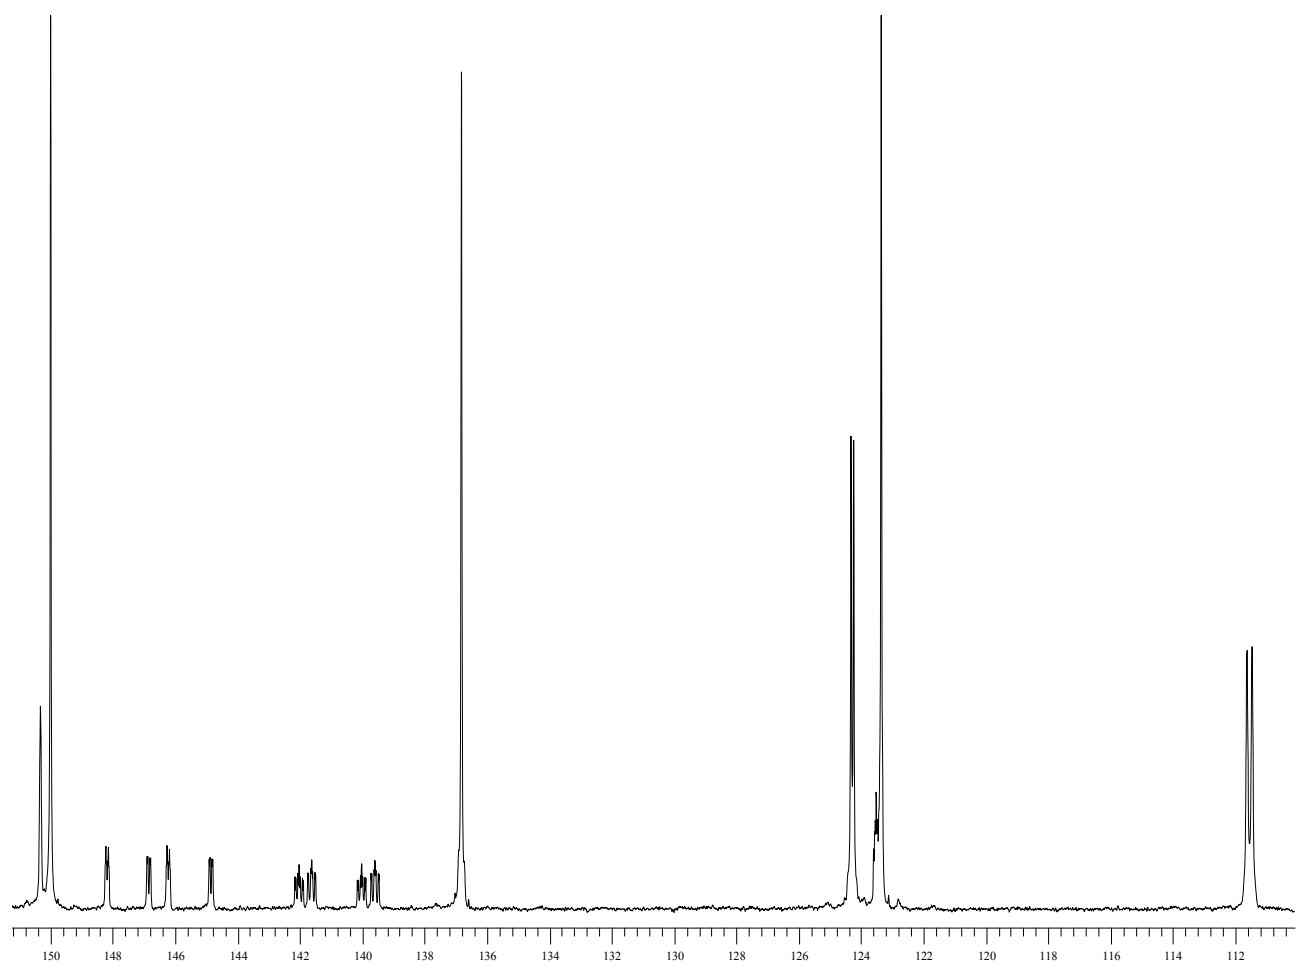

**Figure 4.** <sup>13</sup>C NMR spectrum of F<sub>4</sub>ppyH in CDCl<sub>3</sub>

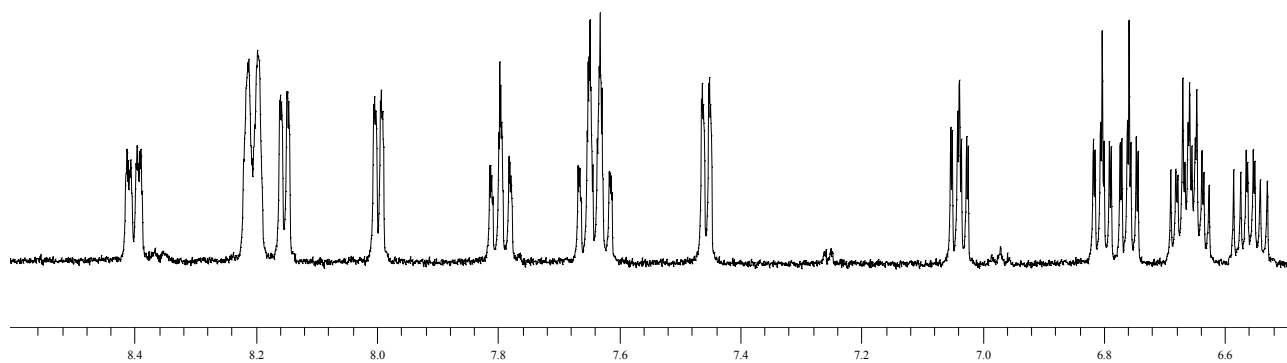

**Figure 5.** <sup>1</sup>H NMR spectrum of mer-Ir(F<sub>3</sub>ppy)<sub>3</sub> in CD<sub>2</sub>Cl<sub>2</sub>

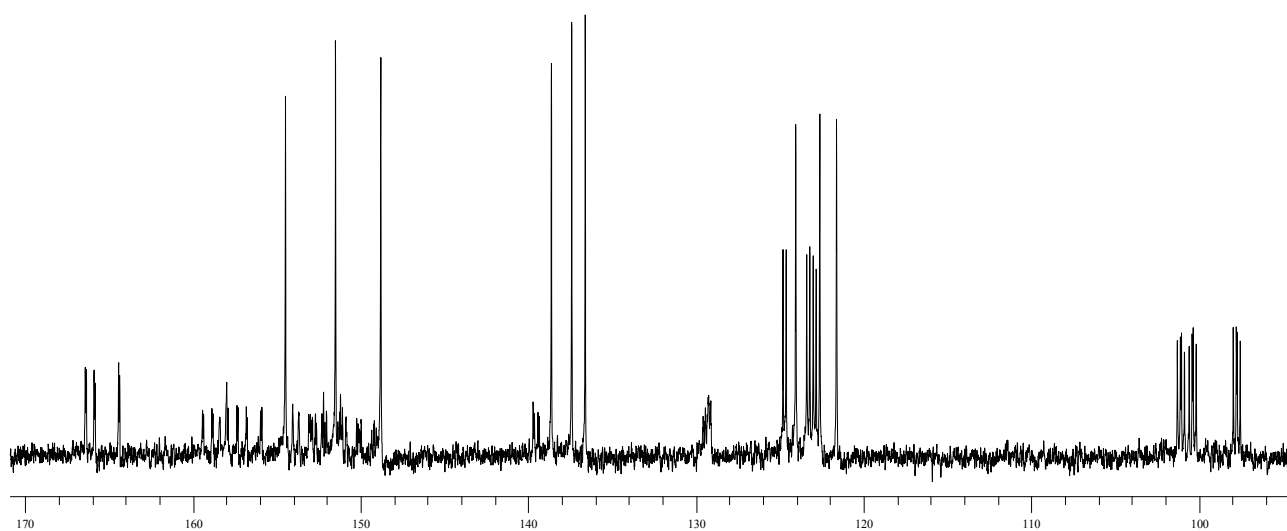

**Figure 6.** <sup>13</sup>C NMR spectrum of mer-Ir(F<sub>3</sub>ppy)<sub>3</sub> in CD<sub>2</sub>Cl<sub>2</sub>

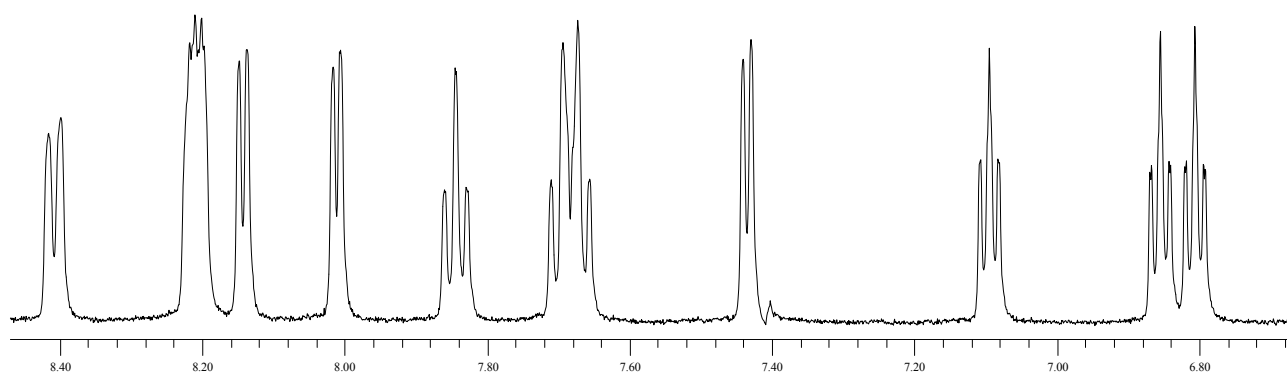

**Figure 7.** <sup>1</sup>H NMR spectrum of mer-Ir(F<sub>4</sub>ppy)<sub>3</sub> in CD<sub>2</sub>Cl<sub>2</sub>

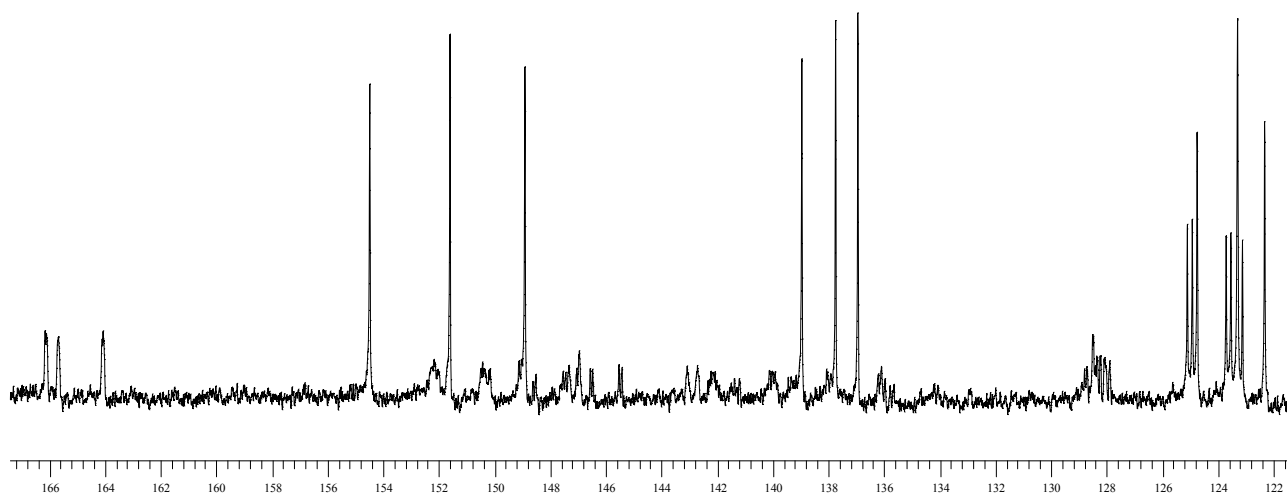

**Figure 8.**  $^{13}\text{C}$  NMR spectrum of  $\text{mer-Ir}(\text{F}_4\text{ppy})_3$  in  $\text{CD}_2\text{Cl}_2$

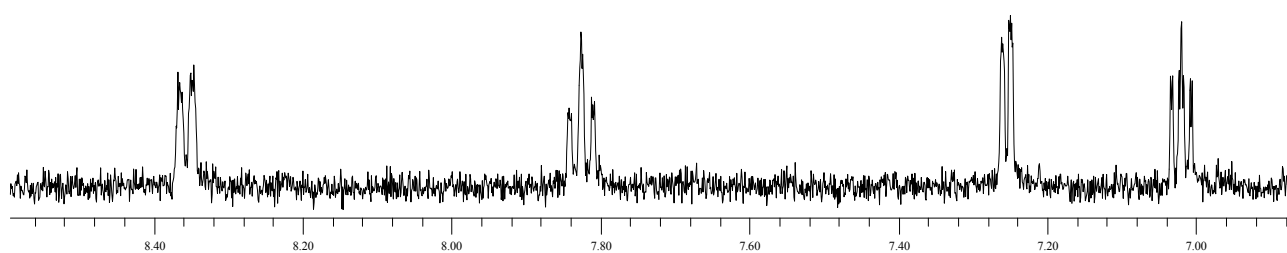

**Figure 9.**  $^1\text{H}$  NMR spectrum of  $\text{fac-Ir}(\text{F}_4\text{ppy})_3$  in  $\text{CD}_2\text{Cl}_2$

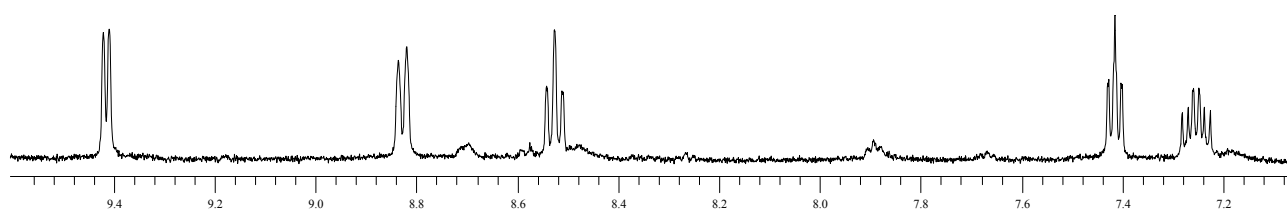

**Figure 10.**  $^1\text{H}$  NMR spectrum of  $(\text{F}_3\text{ppy})_2\text{Ir}(\mu\text{-Cl})_2\text{Ir}(\text{F}_3\text{ppy})_2$  in  $\text{DMSO-d}_6$

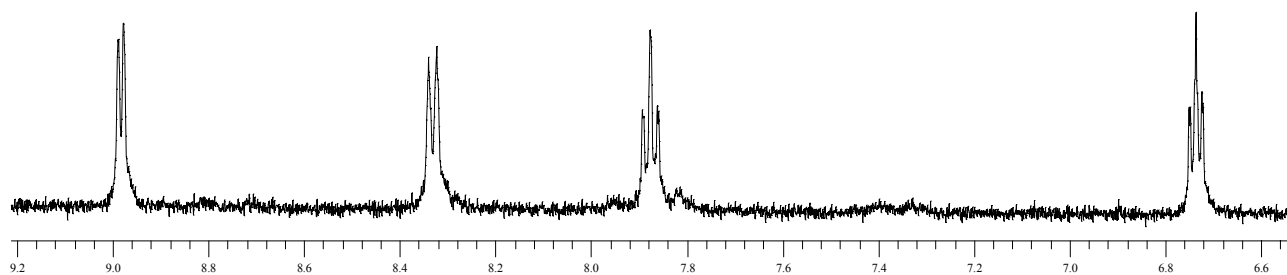

**Figure 11.** <sup>1</sup>H NMR spectrum of (F<sub>4</sub>ppy)<sub>2</sub>Ir(μ-Cl)<sub>2</sub>Ir(F<sub>4</sub>ppy)<sub>2</sub> in CD<sub>2</sub>Cl<sub>2</sub>

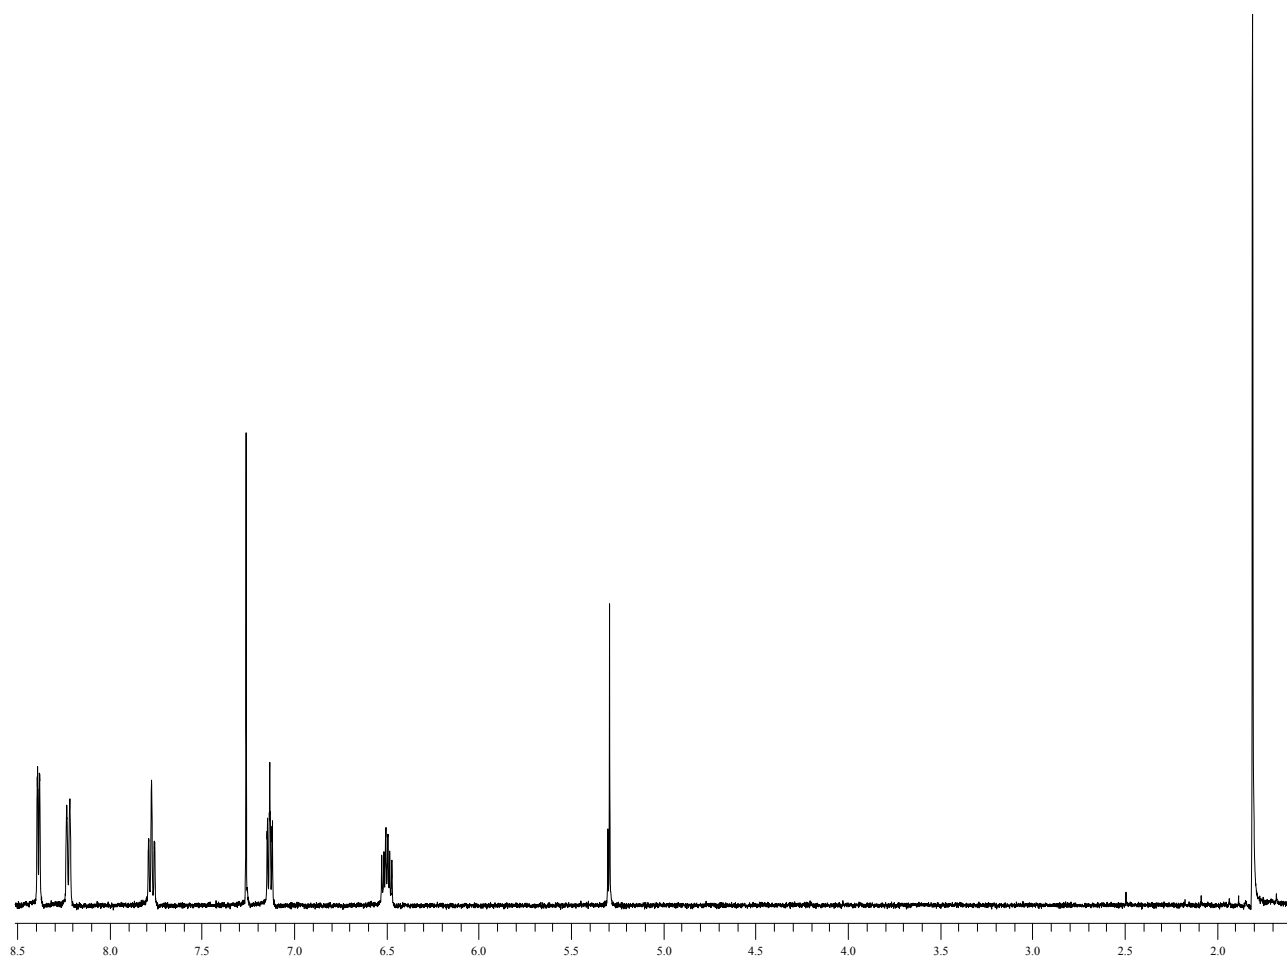

**Figure 12.** <sup>1</sup>H NMR spectrum of (F<sub>3</sub>ppy)<sub>2</sub>Ir(acac) in CDCl<sub>3</sub>

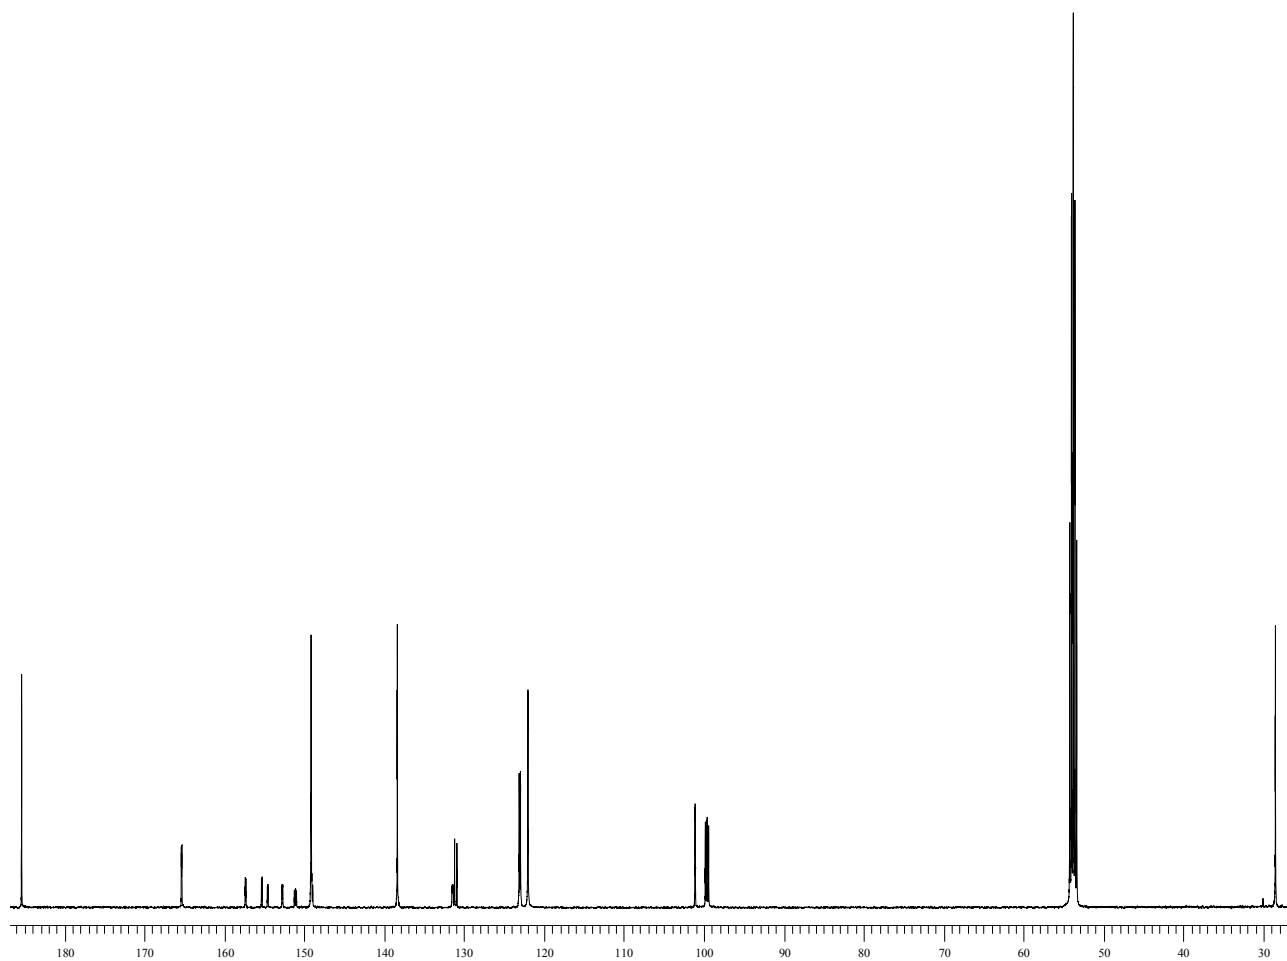

**Figure 13.**  $^{13}\text{C}$  NMR spectrum of  $(\text{F}_3\text{ppy})_2\text{Ir}(\text{acac})$  in  $\text{CD}_2\text{Cl}_2$

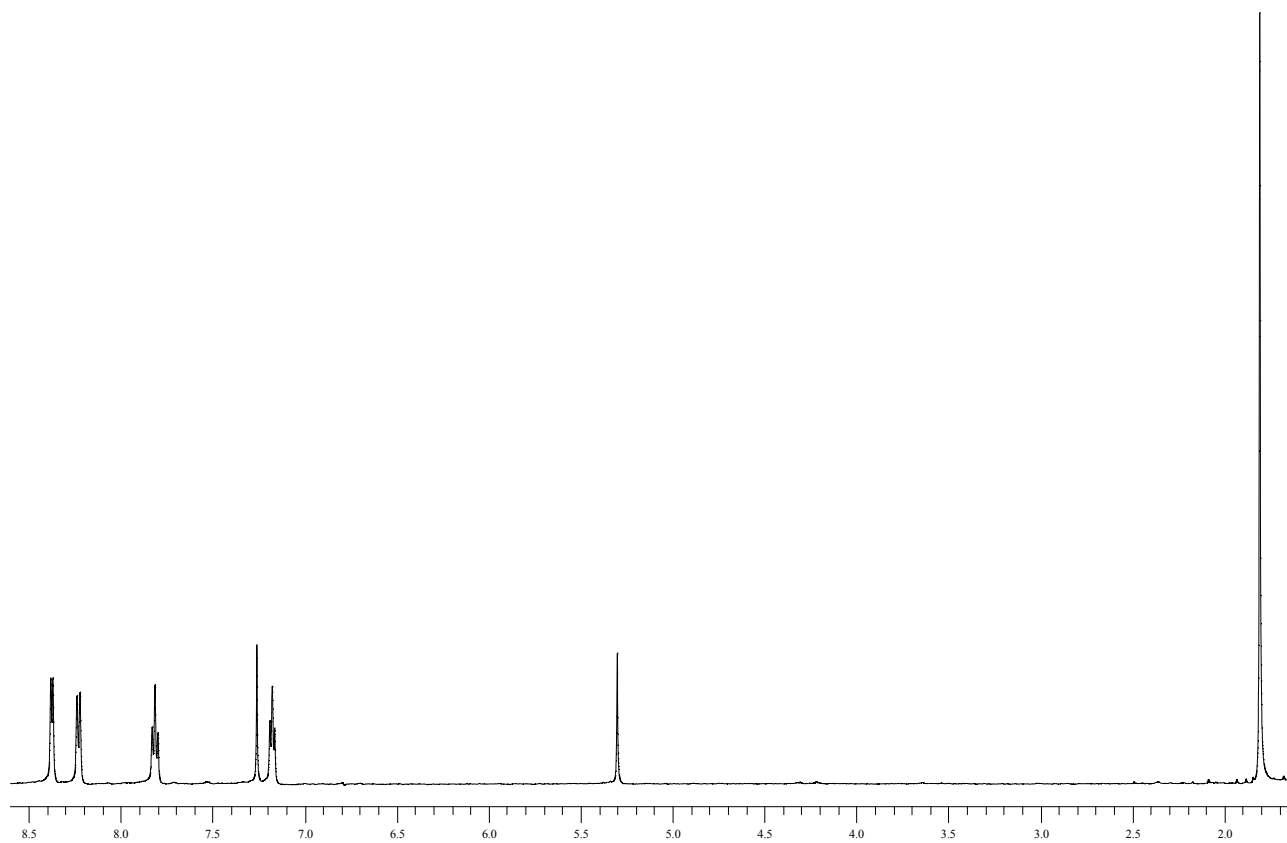

**Figure 14.**  $^1\text{H}$  NMR spectrum of  $(\text{F}_4\text{ppy})_2\text{Ir}(\text{acac})$  in  $\text{CDCl}_3$



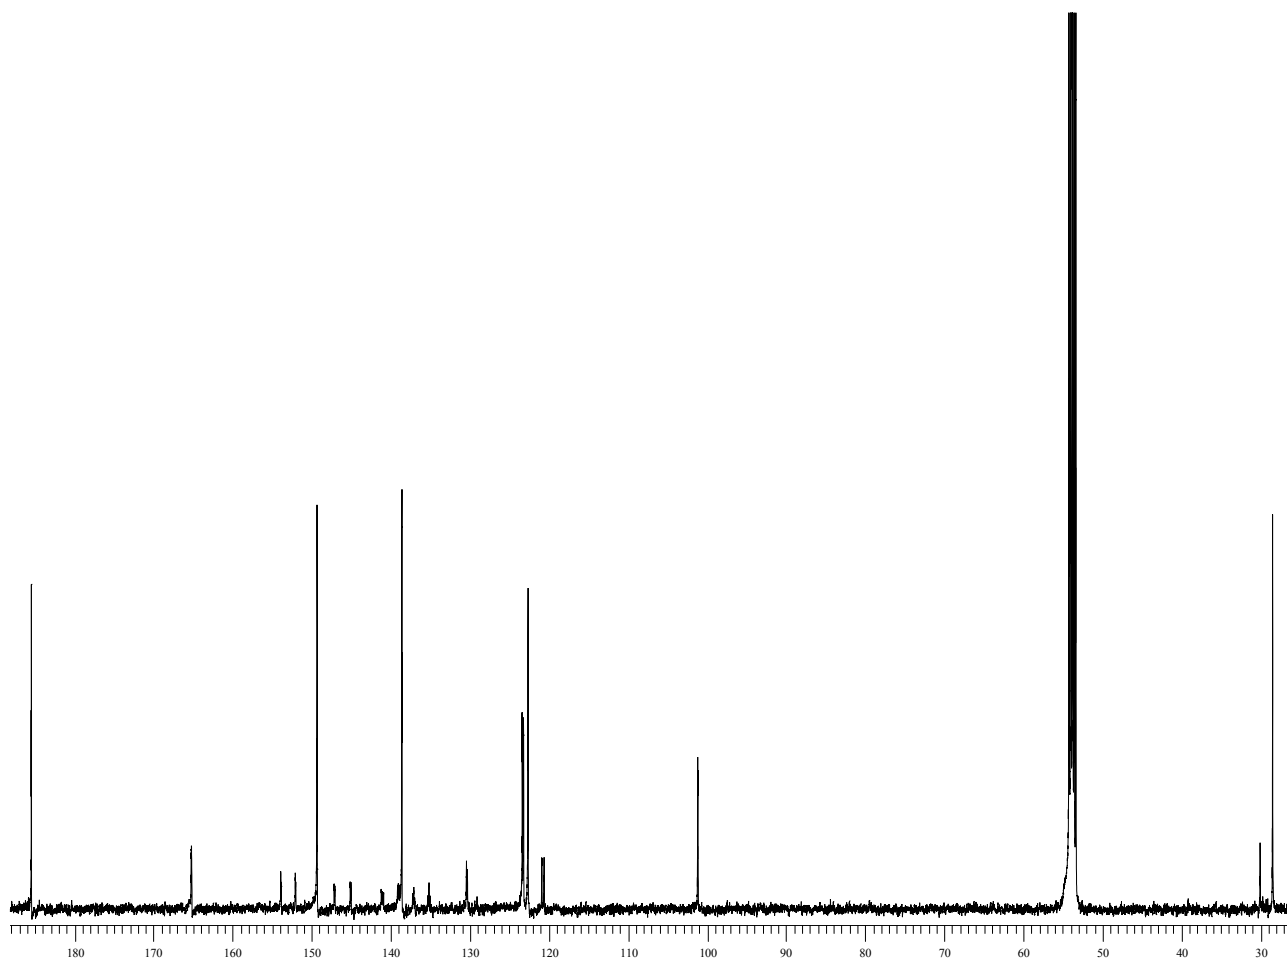

**Figure 15.**  $^{13}\text{C}$  NMR spectrum of  $(\text{F}_4\text{ppy})_2\text{Ir}(\text{acac})$  in  $\text{CD}_2\text{Cl}_2$
